## Correction: Identification of novel gene expression signature in lung adenocarcinoma by using next-generation sequencing data and bioinformatics analysis

Ya-Ling Hsu<sup>1,\*</sup>, Jen-Yu Hung<sup>2,3,\*</sup>, Yen-Lung Lee<sup>4</sup>, Feng-Wei Chen<sup>5</sup>, Kuo-Feng Chang<sup>6</sup>, Wei-An Chang<sup>3,5</sup>, Ying-Ming Tsai<sup>1,3</sup>, Inn-Wen Chong<sup>3,7</sup> and Po-Lin Kuo<sup>5,8,9</sup>

<sup>1</sup> Graduate Institute of Medicine, College of Medicine, Kaohsiung Medical University, Kaohsiung, Taiwan

<sup>2</sup> School of Medicine, College of Medicine, Kaohsiung Medical University, Kaohsiung, Taiwan

<sup>3</sup> Division of Pulmonary and Critical Care Medicine, Department of Internal Medicine, Kaohsiung Medical University Hospital, Kaohsiung, Taiwan

<sup>4</sup> Division of Thoracic surgery, Department of Surgery, Kaohsiung Medical University Hospital, Kaohsiung, Taiwan

<sup>5</sup> Graduate Institute of Clinical Medicine, College of Medicine, Kaohsiung Medical University, Kaohsiung, Taiwan

<sup>6</sup> Welgene Biotech. Inc, Taipei, Taiwan

<sup>7</sup> Department of Respiratory Therapy, College of Medicine, Kaohsiung Medical University, Kaohsiung, Taiwan

<sup>8</sup> Center for Biomarkers and Biotech Drugs, Kaohsiung Medical University, Kaohsiung, Taiwan

<sup>9</sup> Institute of Medical Science and Technology, National Sun Yat-Sen University, Kaohsiung, Taiwan

\* These authors have contributed equally to this work

**Published:** January 15, 2019

**Copyright:** Hsu et al. This is an open-access article distributed under the terms of the Creative Commons Attribution License 3.0 (CC BY 3.0), which permits unrestricted use, distribution, and reproduction in any medium, provided the original author and source are credited.

**This article has been corrected:** The correct Acknowledgments and Funding information is given below:

### ACKNOWLEDGMENTS AND FUNDING

This study was supported by grants from the Ministry of Science and Technology (MOST 106-2314-B-037-064; MOST 104-2320-B-037-014-MY3; MOST 104-2314-B-037-053-MY4; MOST 103-2320-B-037-006-MY3), the Kaohsiung Medical University “Aim for the Top 500 Universities Grant” (Grant No. KMU-TP105C05), the Kaohsiung Medical University “Aim for the Top Journals Grant” (Grant No. KMU-DT106005), and the Kaohsiung Medical University Hospital Research Foundation (KMUH106-6R13).

Original article: Oncotarget. 2017; 8:104831-104854. <https://doi.org/10.18632/oncotarget.21022>
